# Supplementary material
Source: PubMed Central journal article supplement (PMC7686153)

Figure S1

(A)

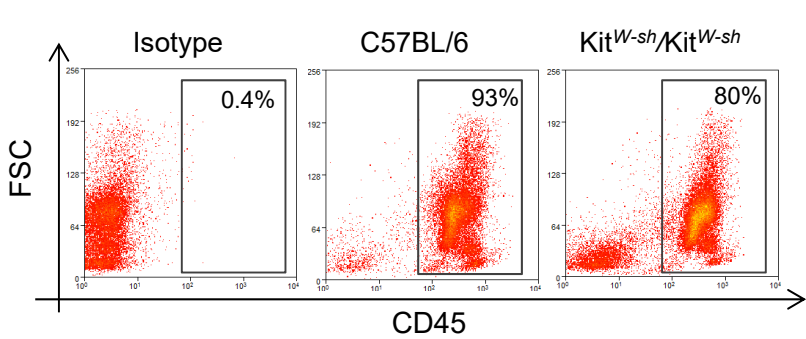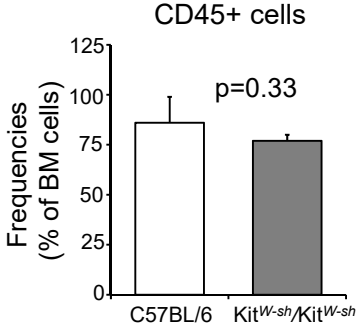

(B)

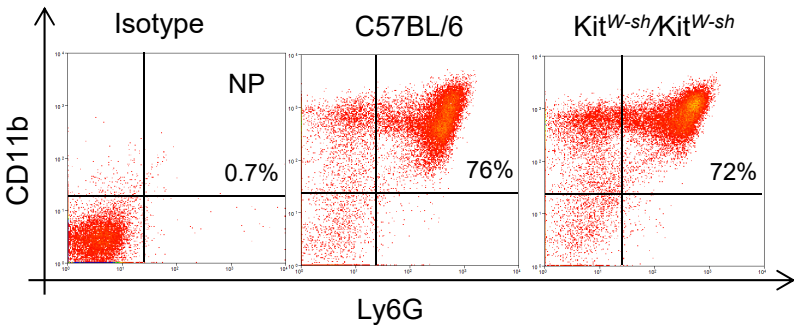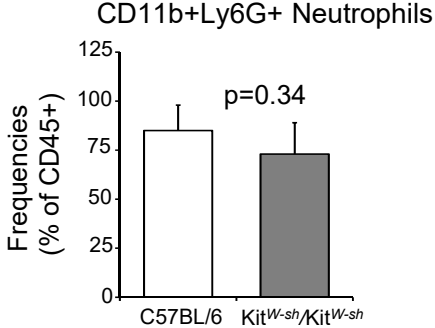

Figure S2

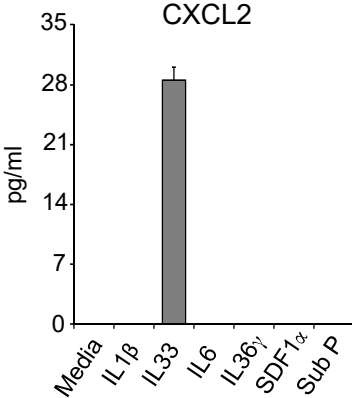

Supplement: NIHMS1618851-supplement-1.pdf [file NIHMS1618851-supplement-1.pdf]
